# Supplementary material for: Coordination complexes bearing potentially tetradentate phenoxyamine ligands
Source: Royal Society of Chemistry journal article supplement (doi:10.1039/b607753f), 2006-01-01
Supplement: b607753f.pdf [file b607753f.pdf]

# Electronic Supporting information

for

## Coordination Complexes Bearing Potentially Tetradentate Phenoxy-Amine Ligands

Andrew R. F. Cox, Vernon C. Gibson, Edward L. Marshall,  
Andrew J. P. White and David Yeldon

**Table S1.** Crystal Data, Data Collection and Refinement Parameters for compounds **4c** and **5a**.

| data                                                   | <b>4c</b>                                                       | <b>5a</b>                                                        |
|--------------------------------------------------------|-----------------------------------------------------------------|------------------------------------------------------------------|
| <b>formula</b>                                         | C <sub>42</sub> H <sub>72</sub> MgN <sub>2</sub> O <sub>6</sub> | C <sub>54</sub> H <sub>100</sub> CaN <sub>6</sub> O <sub>2</sub> |
| <b>solvent</b>                                         | —                                                               | C <sub>7</sub> H <sub>8</sub>                                    |
| <b>formula weight</b>                                  | 725.33                                                          | 997.61                                                           |
| <b>colour, habit</b>                                   | colourless blocky needles                                       | colourless tabular needles                                       |
| <b>crystal size / mm</b>                               | 0.15 × 0.13 × 0.07                                              | 0.12 × 0.11 × 0.04                                               |
| <b>temperature / K</b>                                 | 173                                                             | 173                                                              |
| <b>crystal system</b>                                  | monoclinic                                                      | triclinic                                                        |
| <b>space group</b>                                     | <i>P</i> 2 <sub>1</sub> / <i>n</i> (no. 14)                     | <i>P</i> $\bar{1}$ (no. 2)                                       |
| <b><i>a</i> / Å</b>                                    | 15.7123(6)                                                      | 10.8234(10)                                                      |
| <b><i>b</i> / Å</b>                                    | 30.5819(12)                                                     | 12.9659(12)                                                      |
| <b><i>c</i> / Å</b>                                    | 18.7720(7)                                                      | 13.1370(11)                                                      |
| <b><math>\alpha</math> / deg</b>                       | —                                                               | 110.331(8)                                                       |
| <b><math>\beta</math> / deg</b>                        | 90.923(3)                                                       | 107.408(8)                                                       |
| <b><math>\gamma</math> / deg</b>                       | —                                                               | 100.882(8)                                                       |
| <b><i>V</i> / Å<sup>3</sup></b>                        | 9019.0(6)                                                       | 1558.8(2)                                                        |
| <b><i>Z</i></b>                                        | 8 [a]                                                           | 1 [b]                                                            |
| <b><i>D</i><sub>c</sub> / g cm<sup>-3</sup></b>        | 1.068                                                           | 1.063                                                            |
| <b>radiation used</b>                                  | Mo-K $\alpha$                                                   | Mo-K $\alpha$                                                    |
| <b><math>\mu</math> / mm<sup>-1</sup></b>              | 0.082                                                           | 0.144                                                            |
| <b><math>\theta</math> max / deg</b>                   | 66                                                              | 65                                                               |
| <b>no. of unique reflns</b>                            |                                                                 |                                                                  |
| <b>measured</b>                                        | 30993                                                           | 10277                                                            |
| <b>obs, <math> F_o  &gt; 4\sigma( F_o )</math></b>     | 24491                                                           | 8941                                                             |
| <b>no. of variables</b>                                | 949                                                             | 372                                                              |
| <b><i>R</i><sub>1</sub>, <i>wR</i><sub>2</sub> [c]</b> | 0.298, 0.447                                                    | 0.175, 0.356                                                     |
| <b>CCDC</b>                                            | 293483                                                          | 293484                                                           |

[a] There are two crystallographically independent molecules in the asymmetric unit. [b] The molecule has crystallographic *C*<sub>i</sub> symmetry. [c]  $R_1 = \sum ||F_o| - |F_c|| / \sum |F_o|$ ;  $wR_2 = \{ \sum [w(F_o^2 - F_c^2)^2] / \sum [w(F_o^2)^2] \}^{1/2}$ ;  $w^{-1} = \sigma^2(F_o^2) + (aP)^2 + bP$ .

Data were collected using an Oxford Diffraction Xcalibur 3 diffractometer, and the structures were refined based on  $F^2$  using the SHELXTL and SHELX-97 program systems.<sup>1</sup>

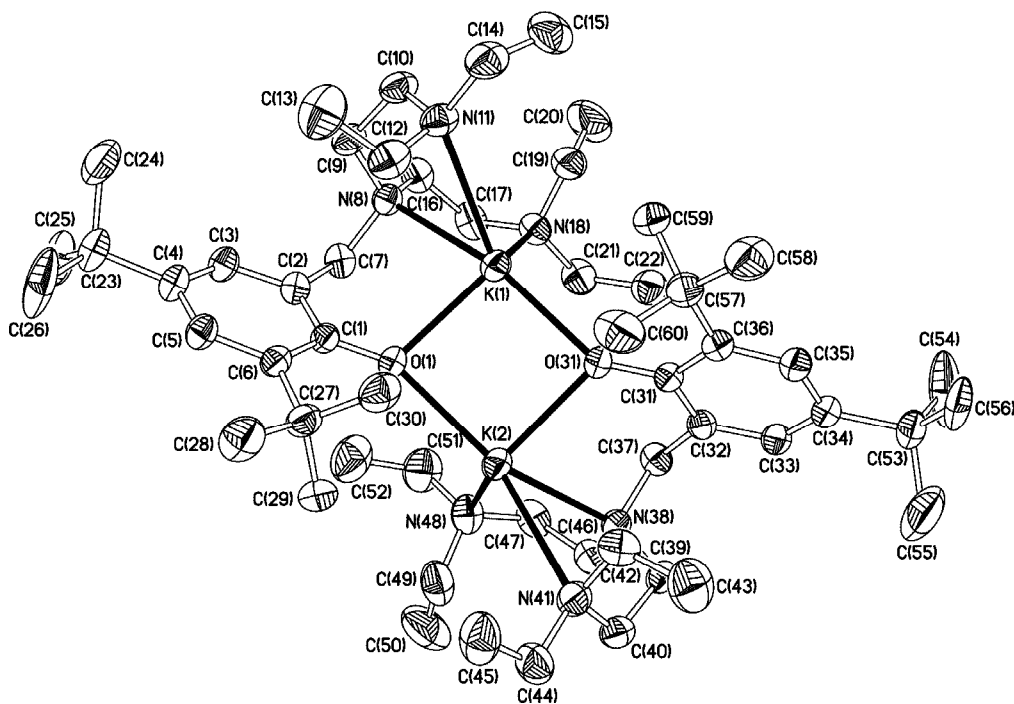

**Fig. S1** The molecular structure of **2a** (50% probability ellipsoids).

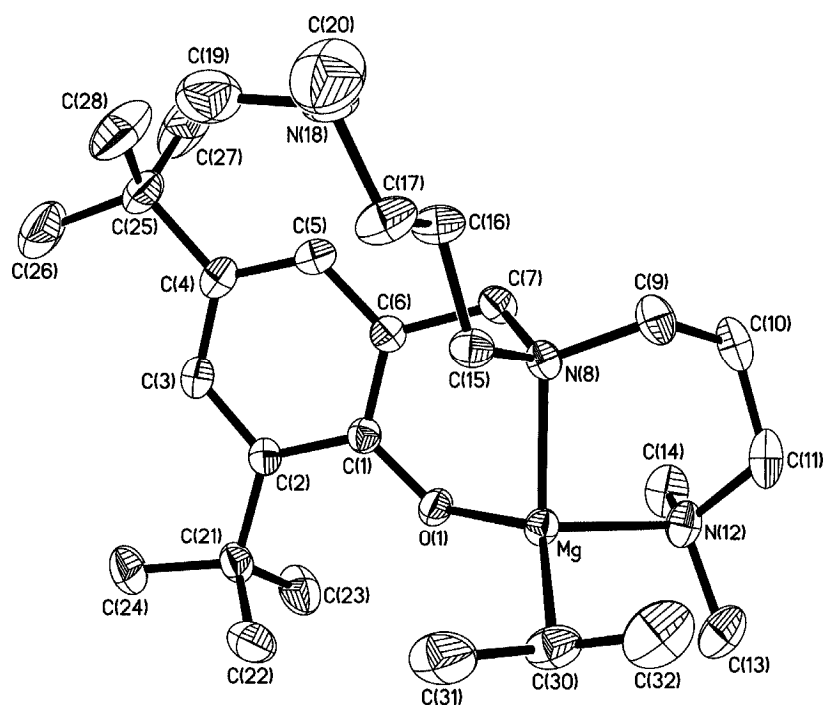

**Fig. S2** The molecular structure of **3b** (50% probability ellipsoids).

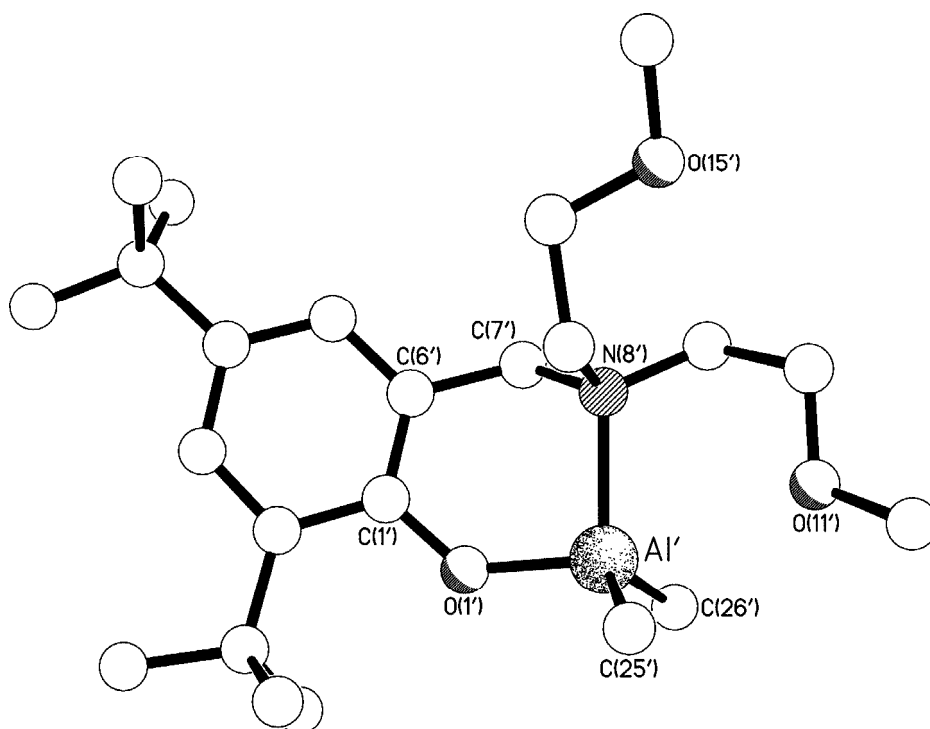

**Fig. S3** The molecular structure of one (II) of the two independent complexes present in the crystals of **6c**.

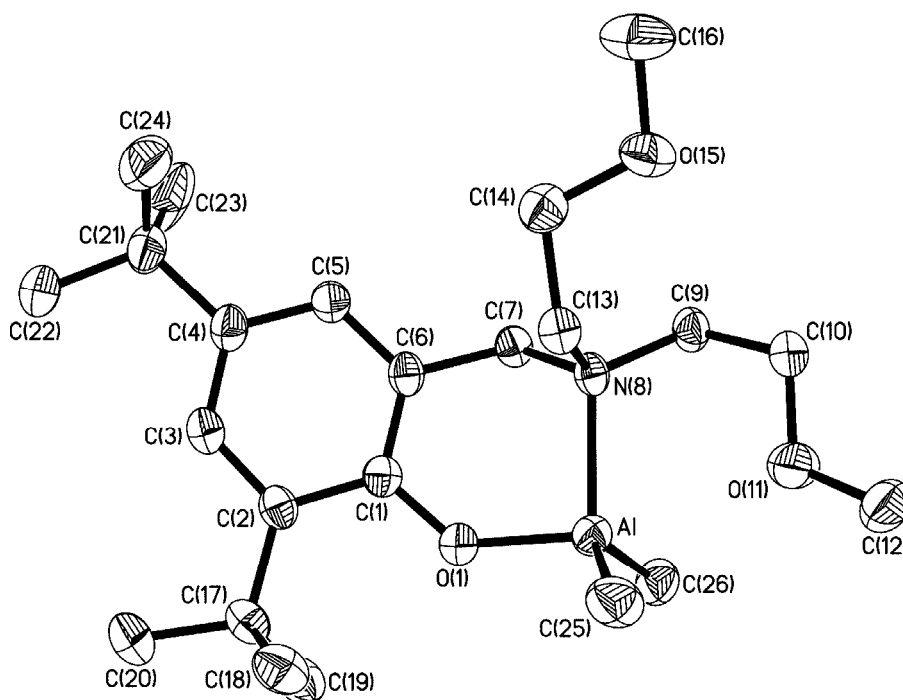

**Fig. S4** The molecular structure of one (I) of the two independent complexes present in the crystals of **6c** (50% probability ellipsoids).

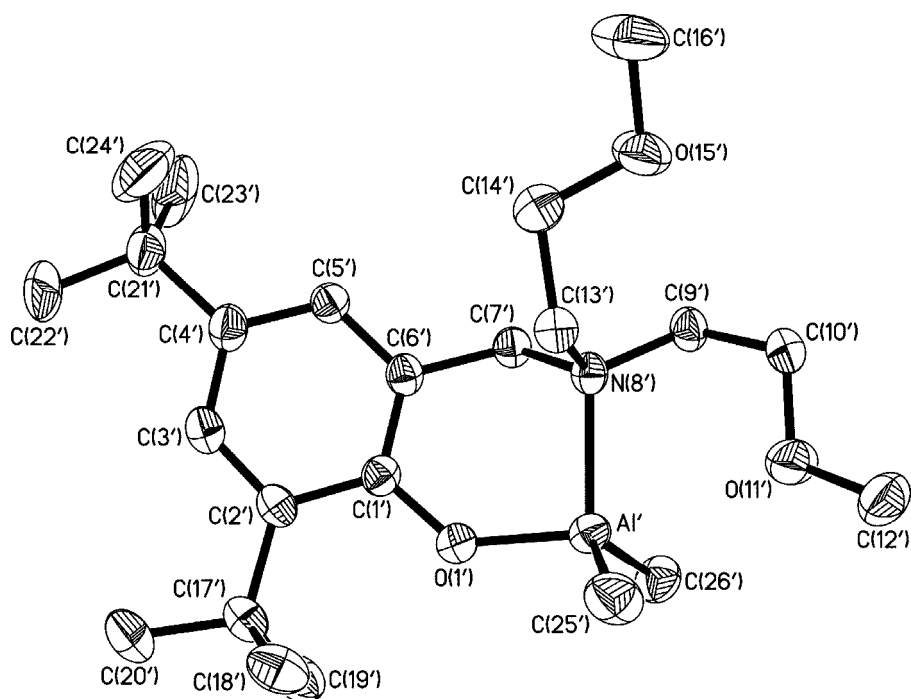

**Fig. S5** The molecular structure of one (**II**) of the two independent complexes present in the crystals of **6c** (50% probability ellipsoids).

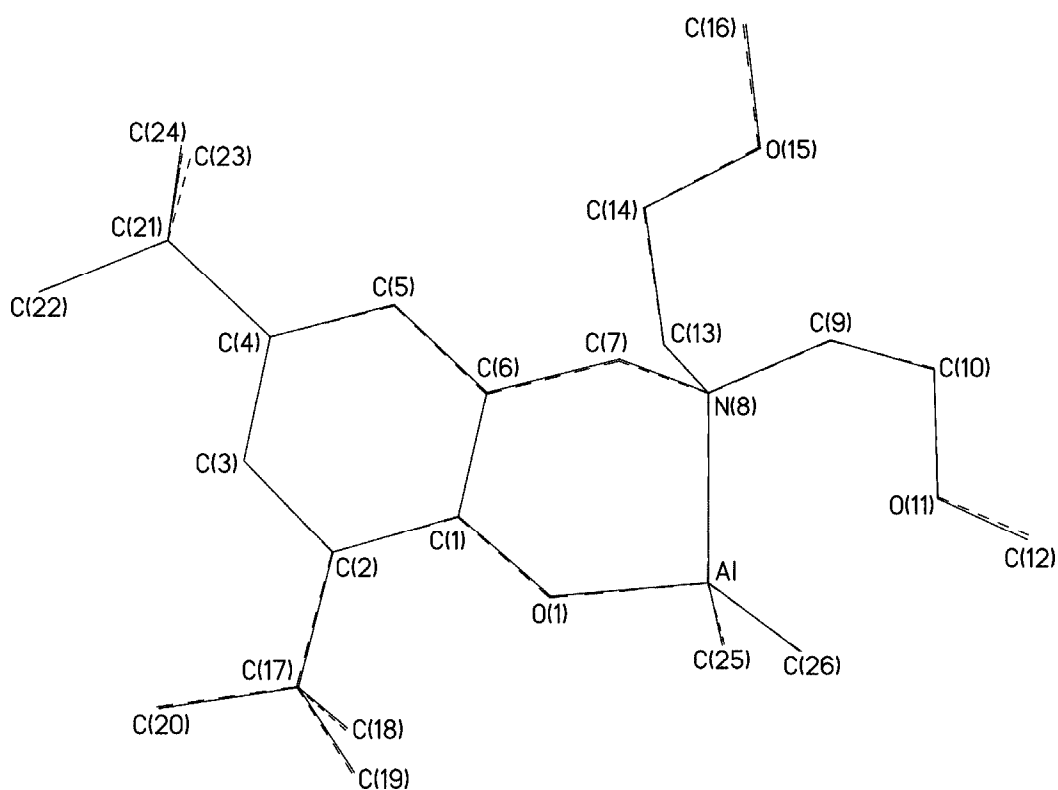

**Fig. S6** Overlay of the two independent complexes (**I** and **II**) present in the crystals of **6c**. The r.m.s. fit of all the non-hydrogen atoms of the two complexes is *ca.* 0.057 Å.

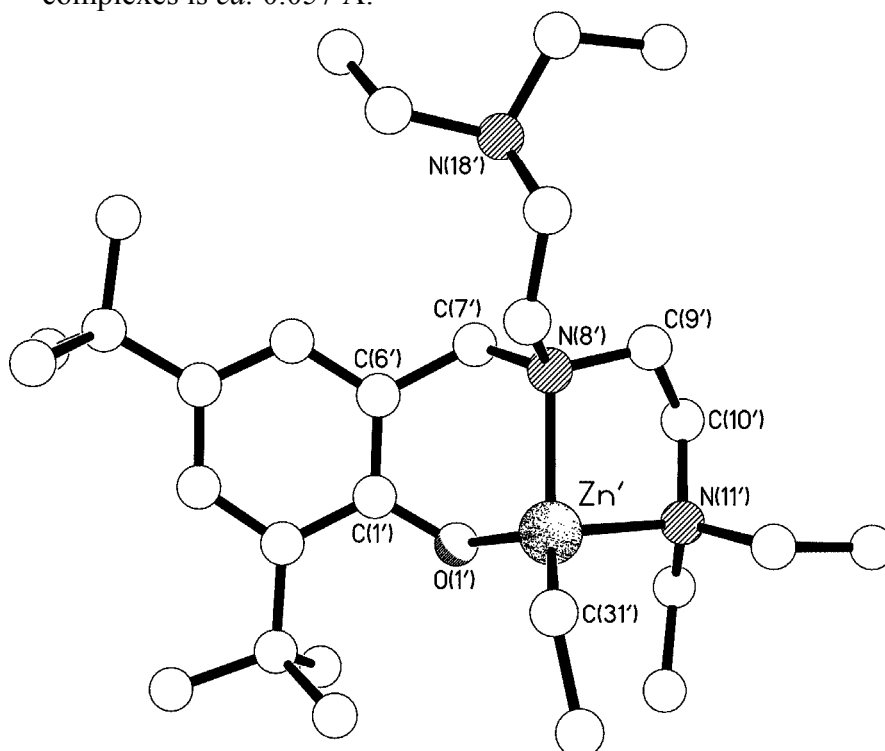

**Fig. S7** The molecular structure of one (**II**) of the two independent complexes present in the crystals of **7a**.

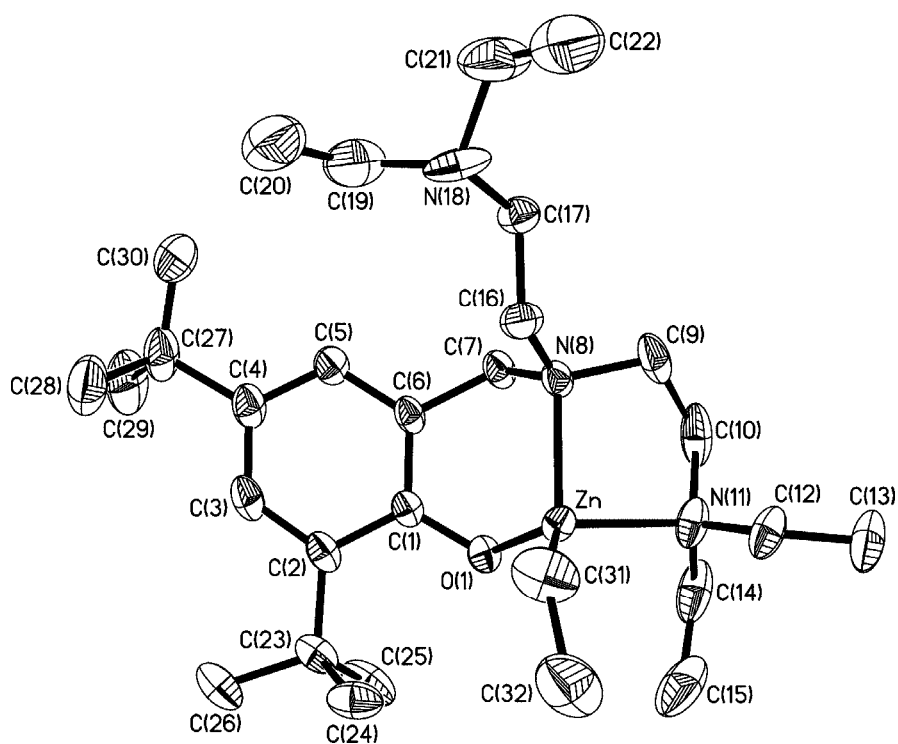

**Fig. S8** The molecular structure of one (**I**) of the two independent complexes present in the crystals of **7a** (30% probability ellipsoids).

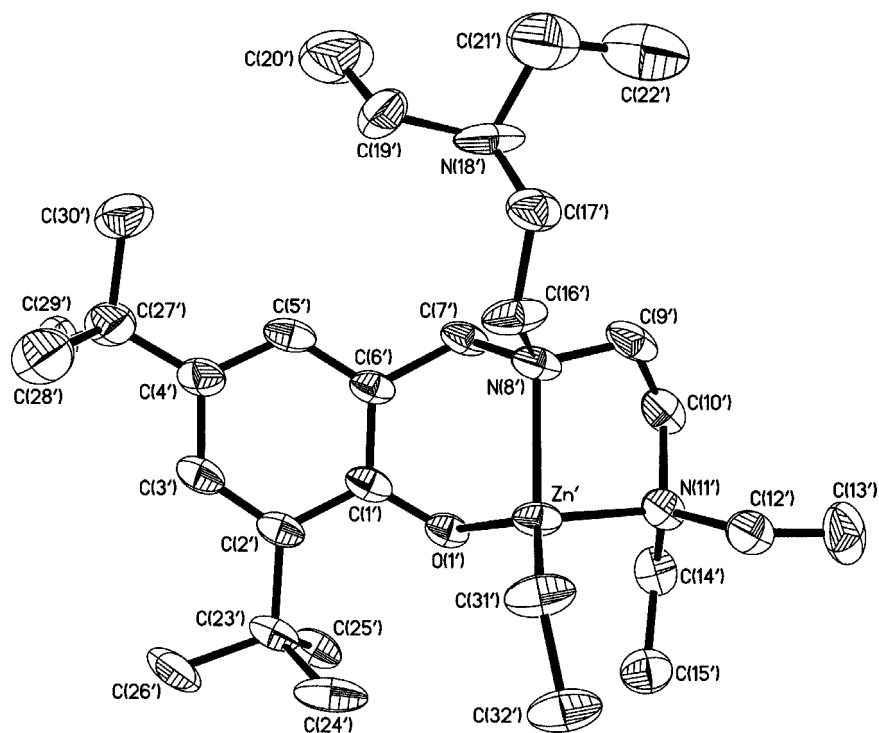

**Fig. S9** The molecular structure of one (**II**) of the two independent complexes present in the crystals of **7a** (30% probability ellipsoids).

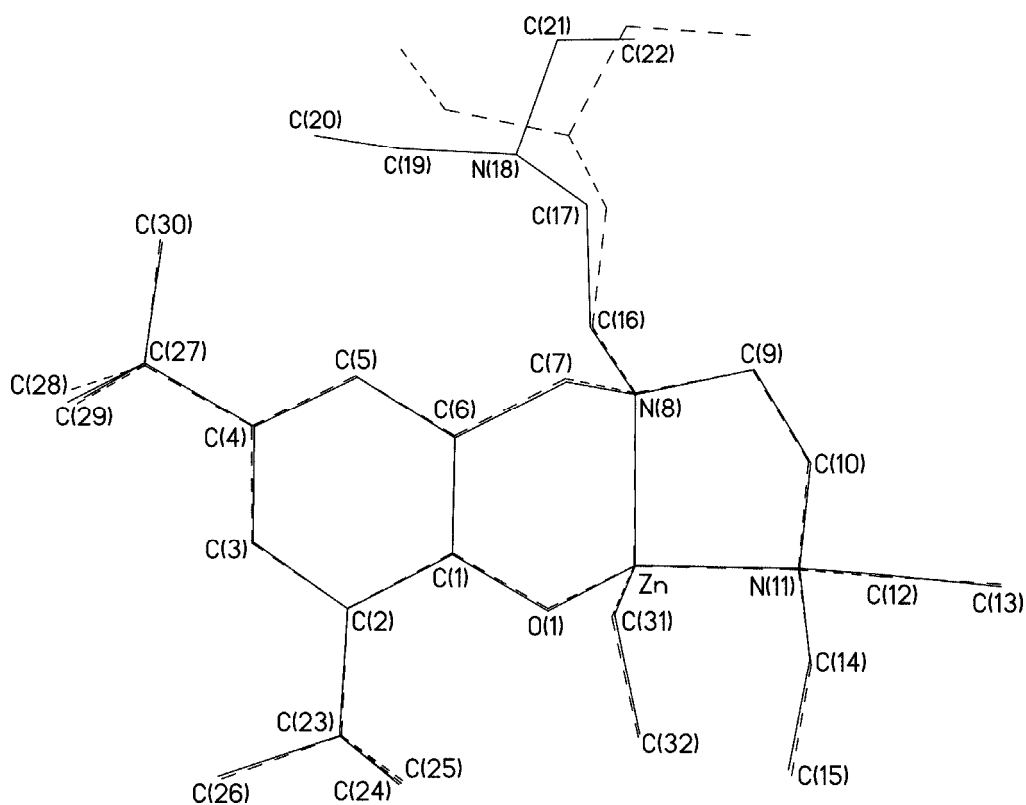

**Fig. S10** Overlay of the two independent complexes (**I** and **II**) present in the crystals of **7a**. With the exception of the disordered C(16) to C(22) sidearm, the non-hydrogen atoms of the two complexes have an r.m.s. fit of *ca.* 0.069 Å.

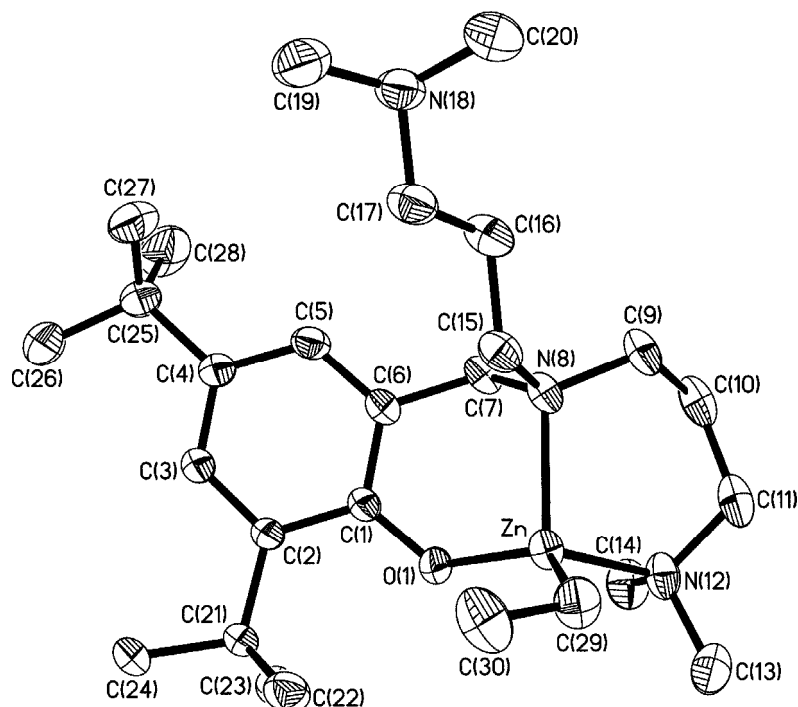

**Fig. S11** The molecular structure of **7b** (50% probability ellipsoids).

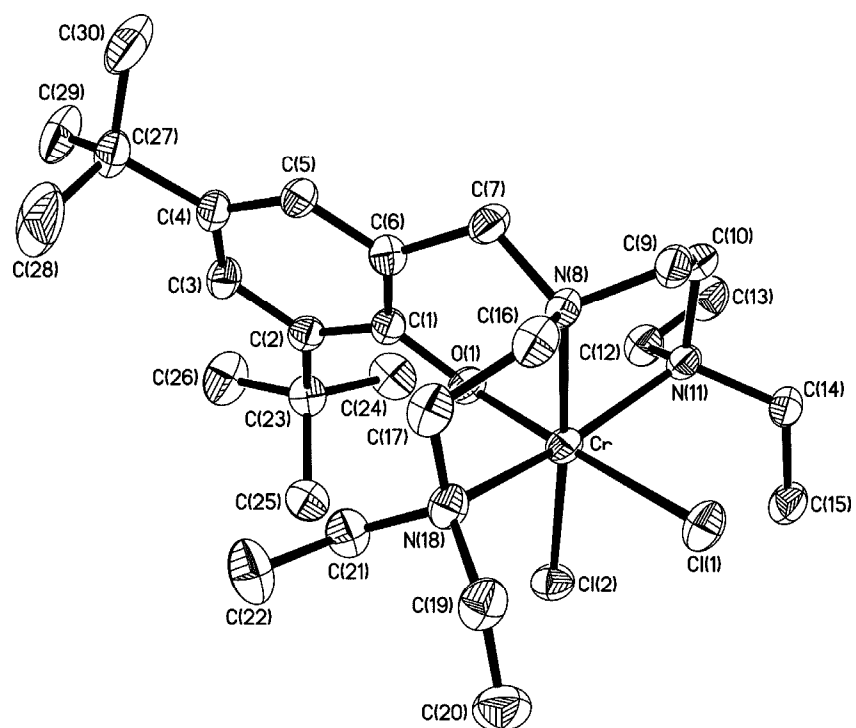



**Fig. S12** The molecular structure of **8a** (50% probability ellipsoids).

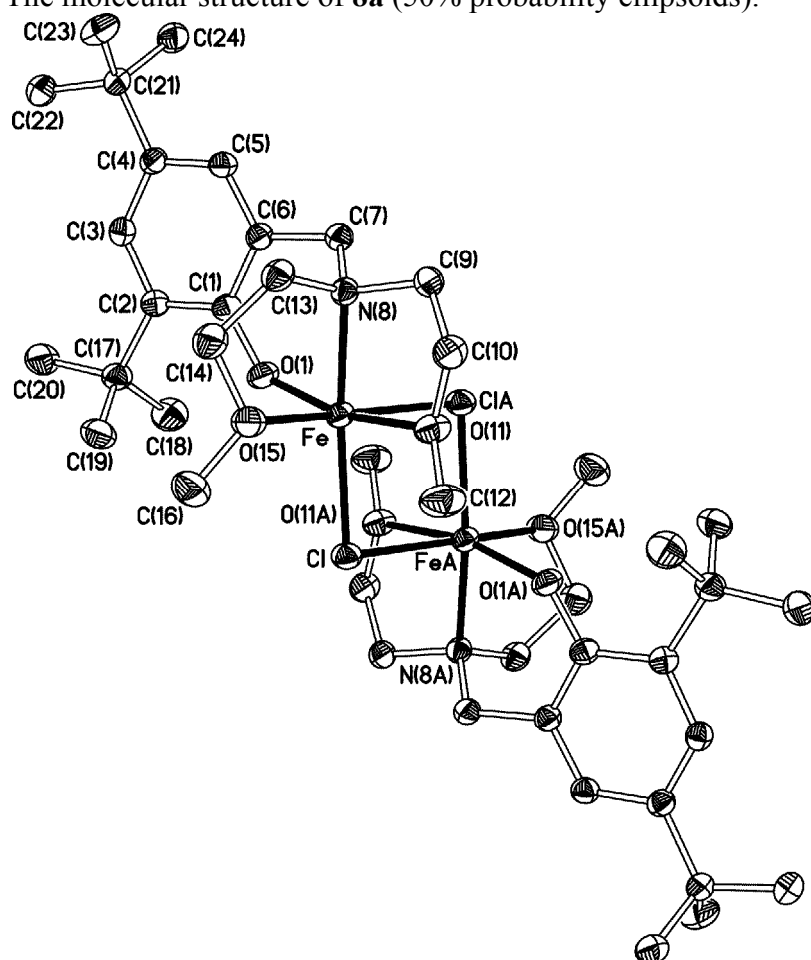

**Fig. S13** The molecular structure of **9c** (50% probability ellipsoids).

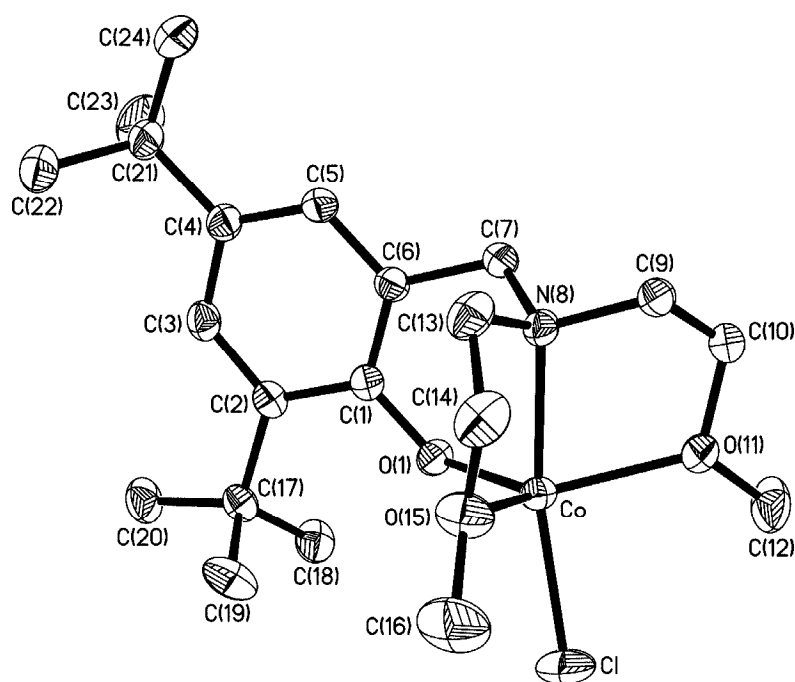

**Fig. S14** The molecular structure of **10c** (50% probability ellipsoids).

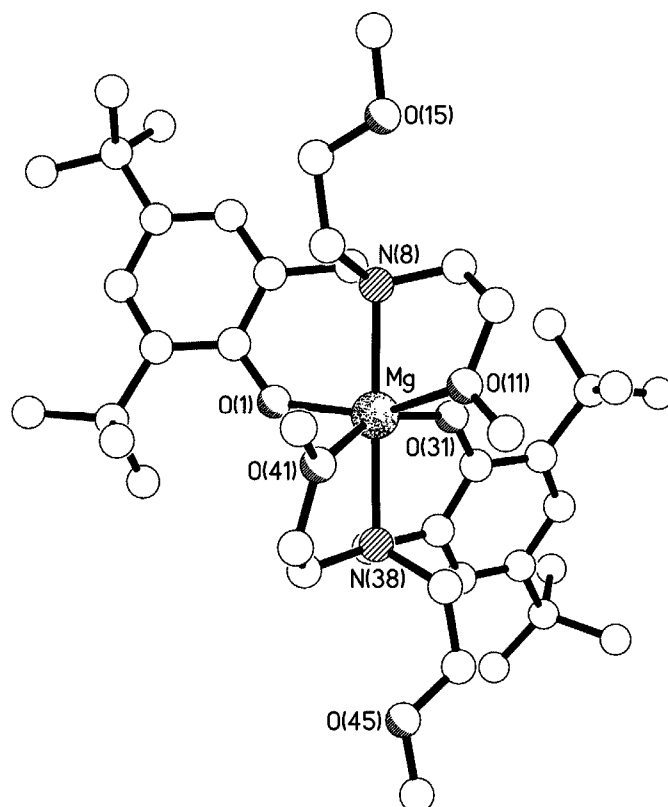

**Fig. S15** The molecular structure of one (**I**) of the two independent complexes present in the crystals of **4c**.

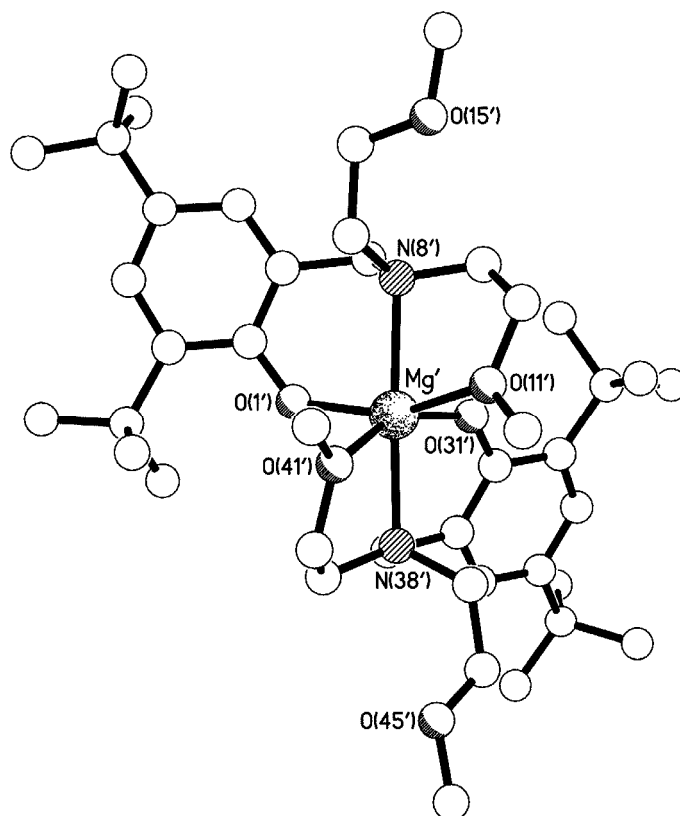

**Fig. S16** The molecular structure of one (II) of the two independent complexes present in the crystals of **4c**.

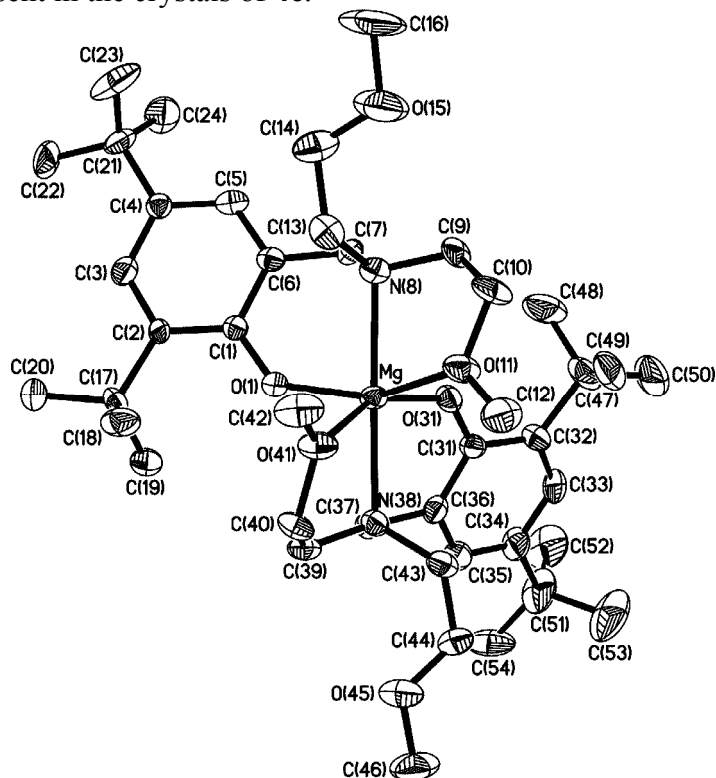

**Fig. S17** The molecular structure of one (I) of the two independent complexes present in the crystals of **4c** (50% probability ellipsoids).

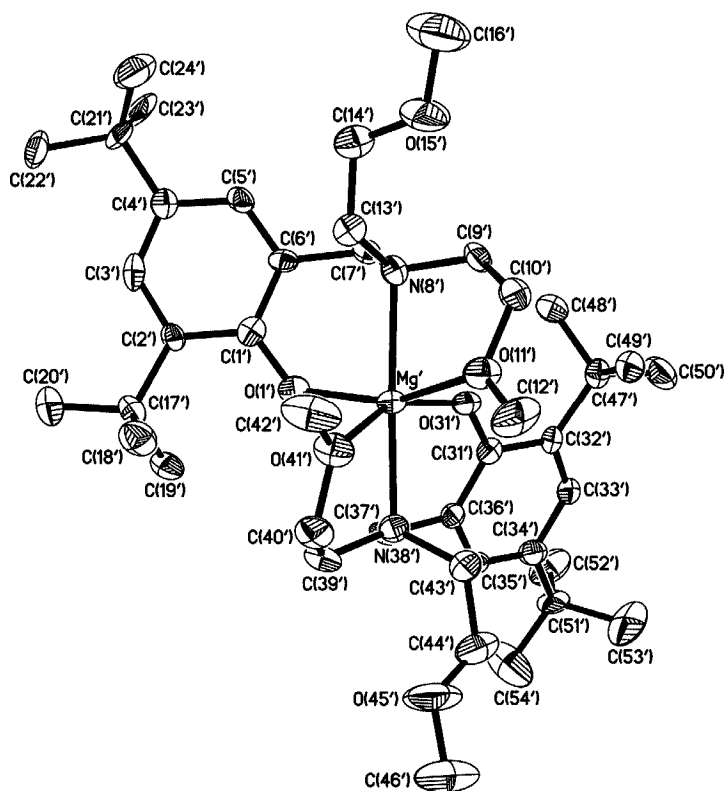

**Fig. S18** The molecular structure of one (**II**) of the two independent complexes present in the crystals of **4c** (50% probability ellipsoids).

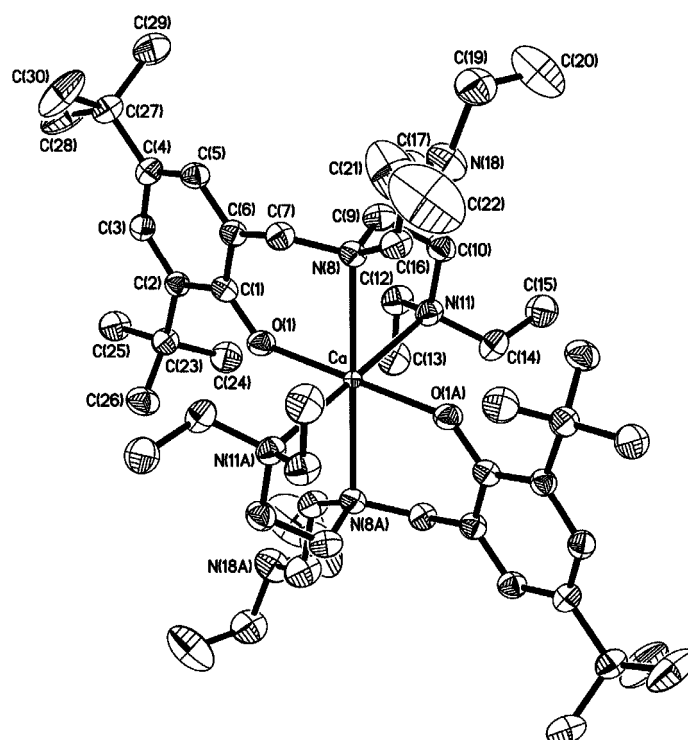

**Fig. S19** The molecular structure of the  $C_i$ -symmetric complex **5a** (50% probability ellipsoids).

## Reference

- <sup>1</sup> SHELXTL PC version 5.1, Bruker AXS, Madison, WI, 1997; SHELX-97, G. Sheldrick, Institut Anorg. Chemie, Tammannstr. 4, D37077 Göttingen, Germany, 199
